# Supplementary material for: Insights into Ongoing Evolution of the Hexachlorocyclohexane Catabolic Pathway from Comparative Genomics of Ten Sphingomonadaceae Strains
Source: PubMed Central journal article supplement (PMC4478539; doi:10.1534/g3.114.015933), 2015-04-07
Supplement: supp_g3.114.015933_FigureS1.pdf [file supp_g3.114.015933_FigureS1.pdf]

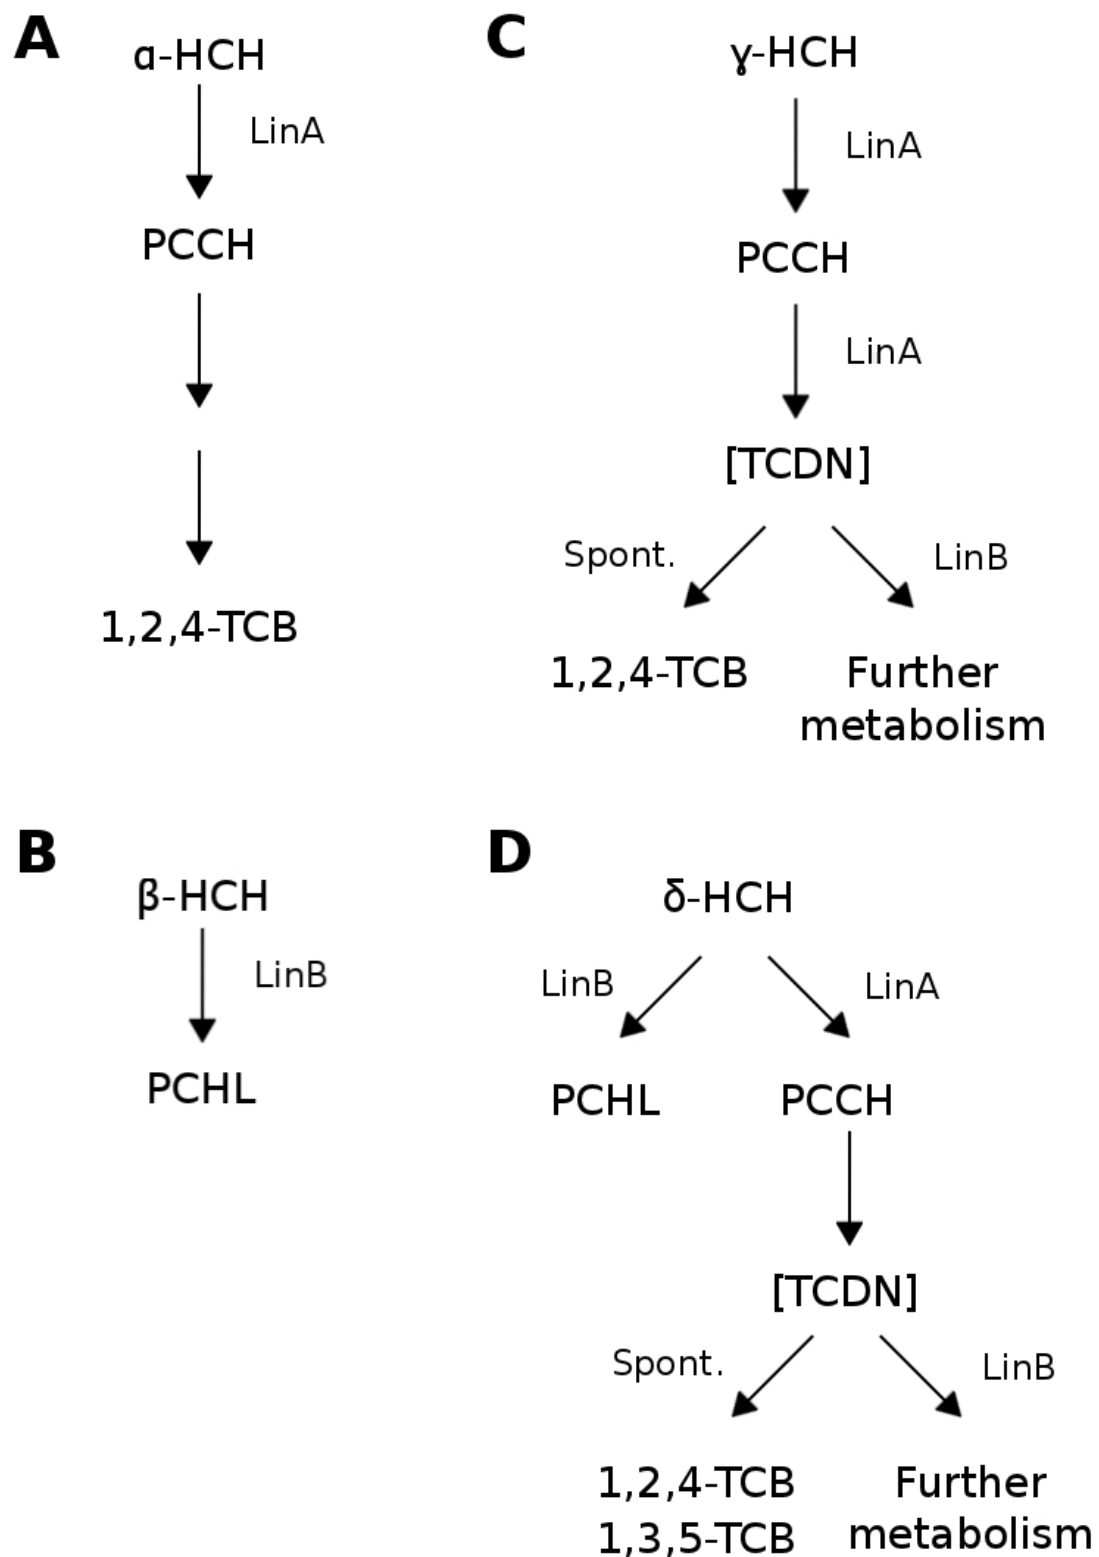

**Figure S1** Summary of HCH isomer degradation. Simplified summary of the initial steps of (A)  $\alpha$ -HCH, (B)  $\beta$ -HCH, (C)  $\gamma$ -HCH and (D)  $\delta$ -HCH isomer degradation by LinA and LinB in UT26. Full pathways are described in reviews by Nagata *et al.* (2007) and Lal *et al.* (2010)
